# Supplementary material for: Increased size and relative abundance of migratory fishes observed near the Athabasca oil sands
Source: Atypon-hosted journal article supplement (doi:10.1139/facets-2017-0028), 2017-01-01
Supplement: facets-2017-0028_supplement1.pdf [file facets-2017-0028_supplement1.pdf]

**Supplementary materials for:**

Increases in size and abundance of migratory fishes observed near the Athabasca oil sands

DOI: 10.1139/facets-2017-0028

Tim J. Arciszewski<sup>1\*†</sup>, Kelly R. Munkittrick<sup>1</sup>, Bruce W. Kilgour<sup>2</sup>, Heather M. Keith<sup>3‡</sup>, Janice E. Linehan<sup>4</sup>, Mark E. McMaster<sup>5</sup>

<sup>1</sup> Canada's Oil Sands Innovation Alliance (COSIA), Calgary, AB, T2P 3R7

<sup>2</sup> Kilgour and Associates, Ottawa, ON, K1G 4Z6

<sup>3</sup> Hatfield Consultants Partnership, North Vancouver, BC, V7P 0A3

<sup>4</sup> Suncor Energy, Calgary, AB, T2P 3E3

<sup>5</sup> Environment and Climate Change Canada (ECCC), Burlington, ON, L7S 1A1

<sup>†</sup> Current address: Alberta Energy Regulator (AER), Calgary, AB, T2P 0R4

<sup>‡</sup> Current address: District of West Vancouver, West Vancouver, BC, V7V 3T3

\*Corresponding author: [tima@unb.ca](mailto:tima@unb.ca)

## R scripts

```
## Tolerance Intervals
```

```
## mean
```

```
mu <- 0
```

```
## Standard deviation
```

```
sig <- 1
```

```
## sample size
```

```
n <- 20
```

```
## coverage probability (90%)
```

```
gamma <- 0.9
```

```
## percentiles of non-central  $t$  to attain desired coverage probability (gamma)
```

```
G1 <- (1 - gamma) / 2
```

```
G2 <- 1 - ((1 - gamma) / 2)
```

```
## upper limit of desired central (95% in this case) confidence interval
```

```
p <- 0.975
```

```
## Inner tolerance k-factor
```

```
k1 <- qt(G1, n - 1, sqrt(n) * qnorm(p)) / sqrt(n)
```

```
## Outer tolerance k-factor
```

```
k2 <- qt(G2, n - 1, sqrt(n) * qnorm(p)) / sqrt(n)
```

```
## Inner limit of tolerance
```

```
IT <- k1 * sig
```

```
## Outer limit of tolerance
```

```
OT <- k2 * sig
```

```
## Estimated percentile (i.e., 97.5)
```

```
med <- 1.96 * sig
```

```
## Tolerance limits for 2.5 percentile
```

```
OTL2.5 <- mu - OT
```

```
ptile2.5 <- mu - med
```

```
ITL2.5 <- mu - IT
```

```
## Tolerance limits for 97.5 percentile
```

```
ITL97.5 <- mu + IT
```

```
ptile97.5 <- mu + med
```

```
OTL97.5 <- mu + OT
```

```
## Parametric bootstrapping for estimating error of CPUE

## number of bootstrap samples
B <- 100000

## mean of observed of log10(x+1) transformed CPUE

mu<- 0.066

## standard deviation of log10(x+1) transformed CPUE
sd<-0.121

## resample size
n<-7

##generate B bootstrap samples
resamples <- lapply(1:B, function(i)
  rnorm(n,mu,sd))

## Calculate 95th percentile for B bootstrap samples from 'resamples'
UpperTail <- sapply(resamples, quantile, c(0.95))

## 2.5, 50, and 97.5 percentiles of distribution of B 95th percentiles (rounded to 3 decimals)
round(quantile(UpperTail, c(0.025,0.50,0.975)),3)
```

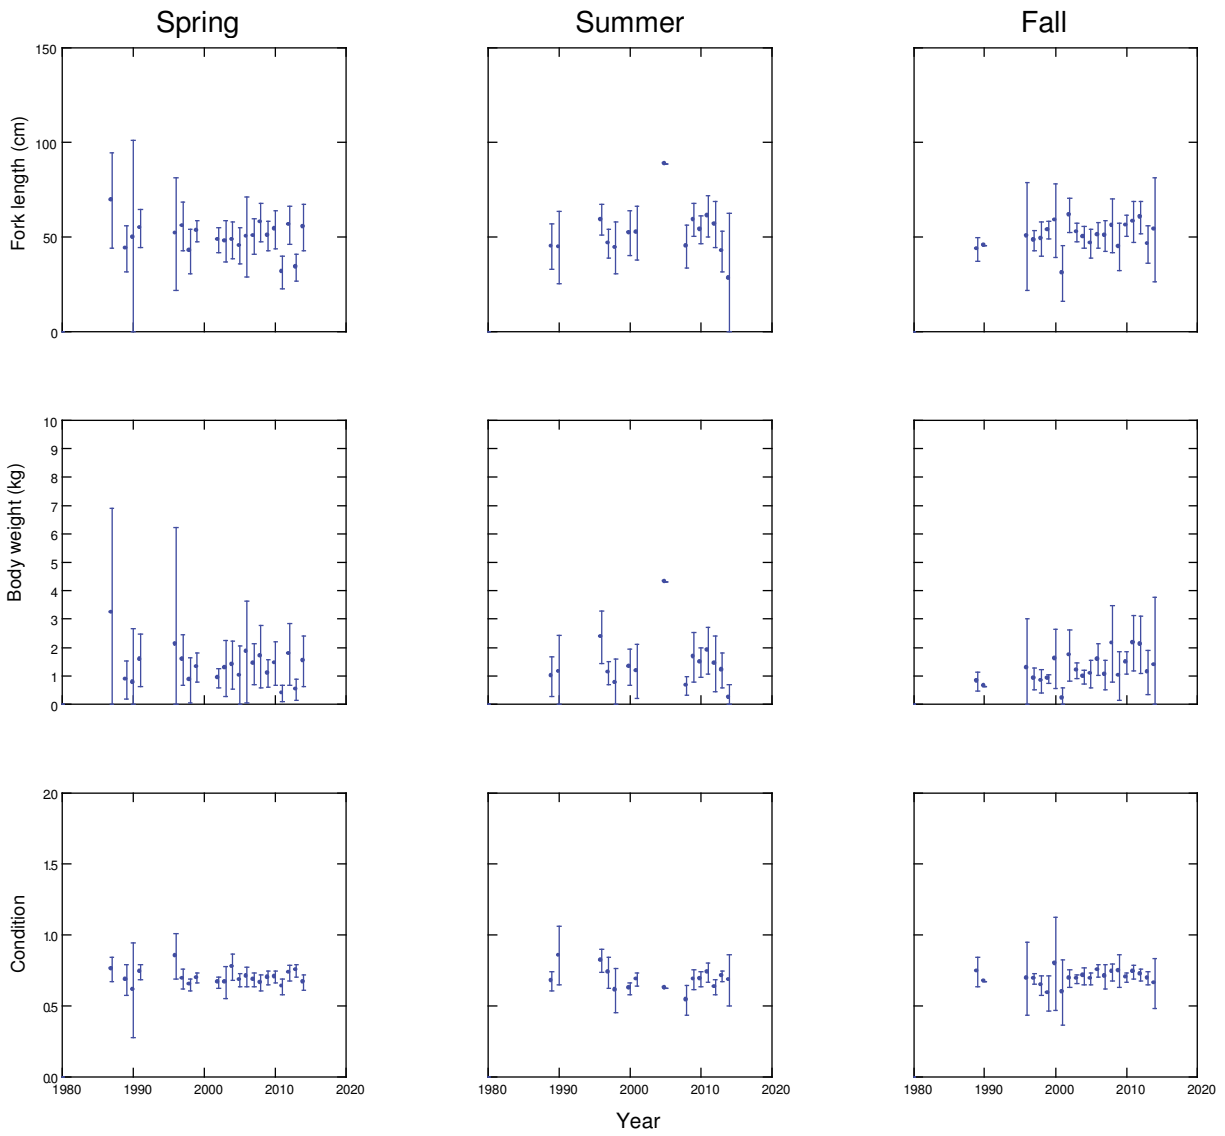

Fig. S1 Mean fork length ( $\pm 2$ SE), body weight ( $\pm 2$ SE), and condition ( $\pm 2$ SE) of northern pike captured in the spring, summer, and fall inventories conducted in the mainstem Athabasca since 1987.

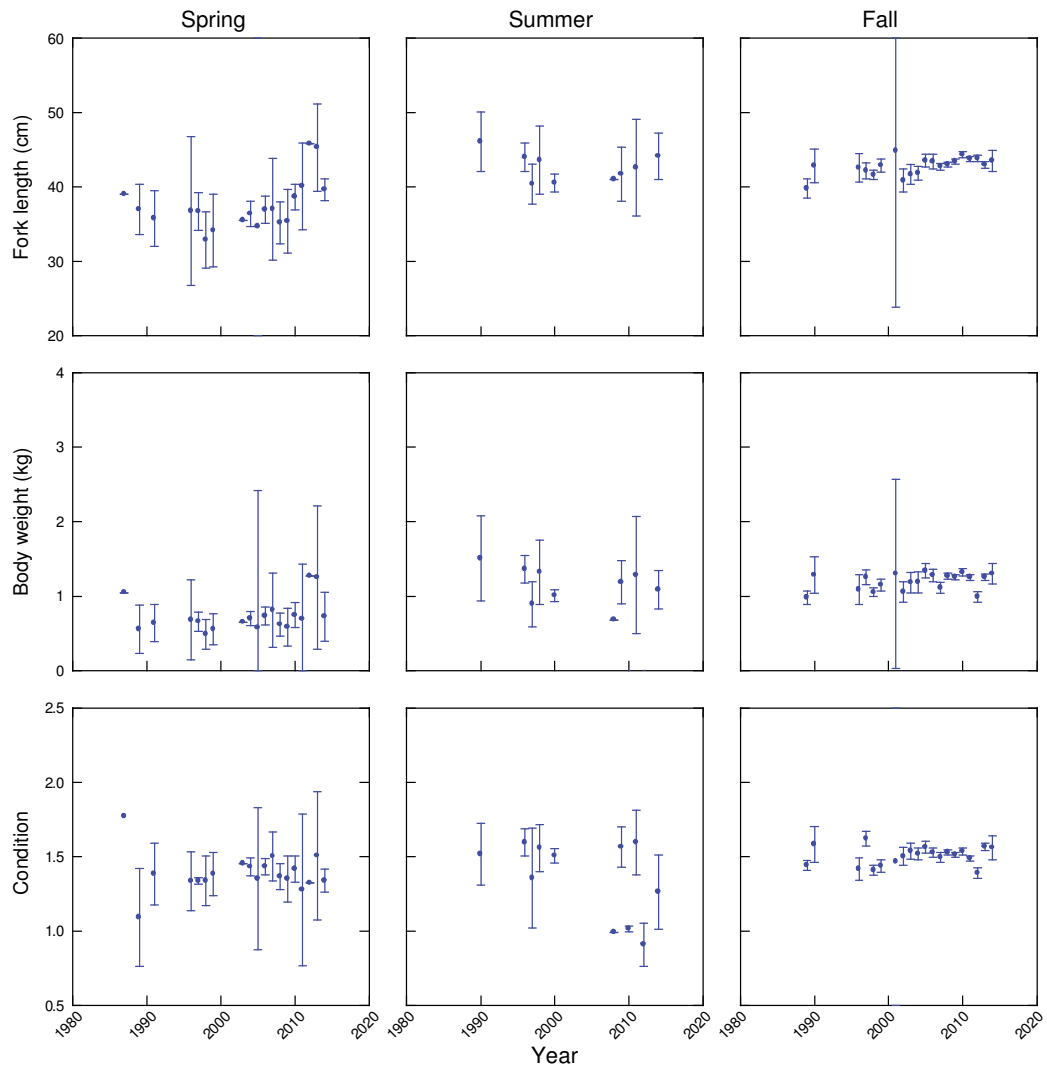

Fig. S2 Mean fork length ( $\pm 2$ SE), body weight ( $\pm 2$ SE), and condition ( $\pm 2$ SE) of lake whitefish captured in the spring, summer, and fall inventories conducted in the mainstem Athabasca since 1987.

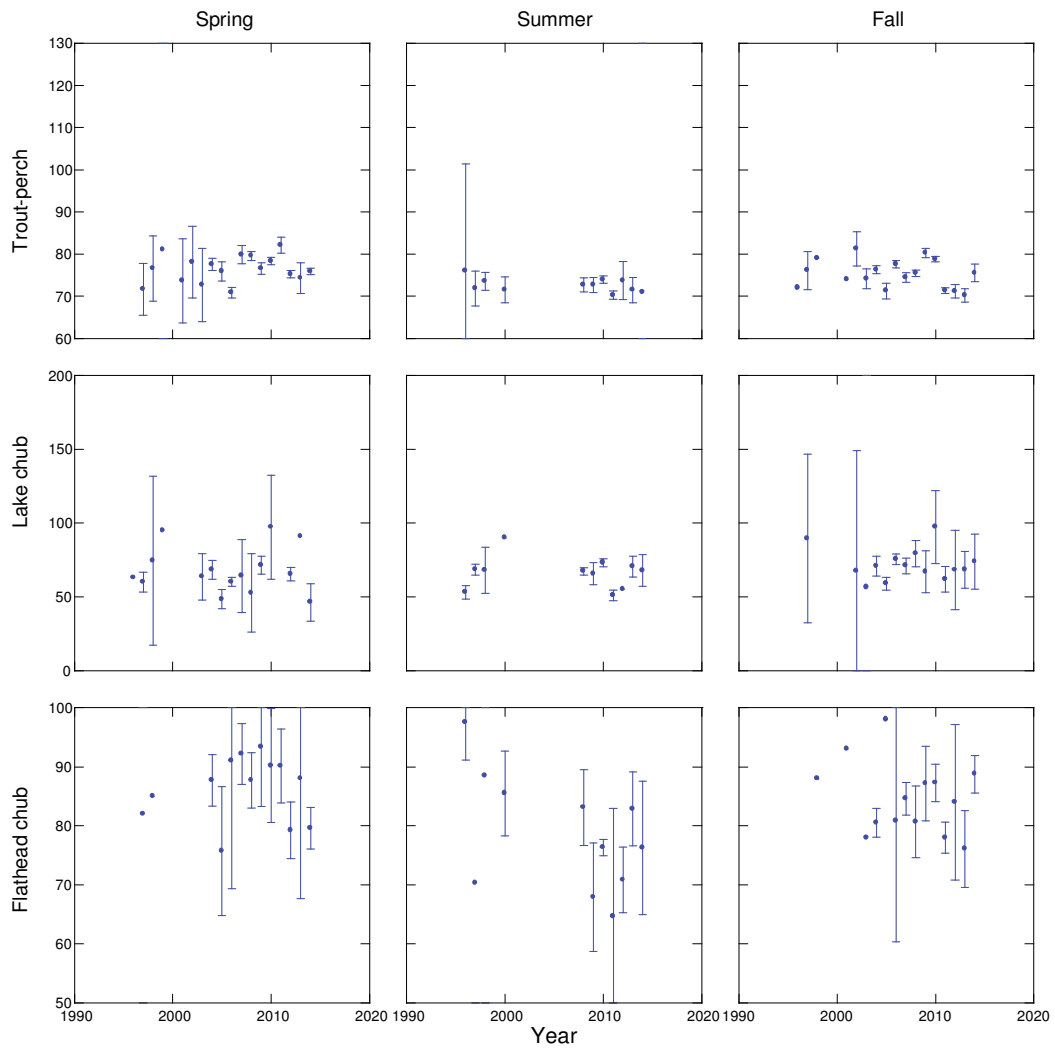

Fig. S3 Mean fork length ( $\pm 2SE$ ) of trout-perch, lake chub, and flathead chub captured in the spring, summer, and fall inventories conducted in the mainstem Athabasca since 1987; weight and condition excluded: weight measured with imprecise resolution before 2008-2010.

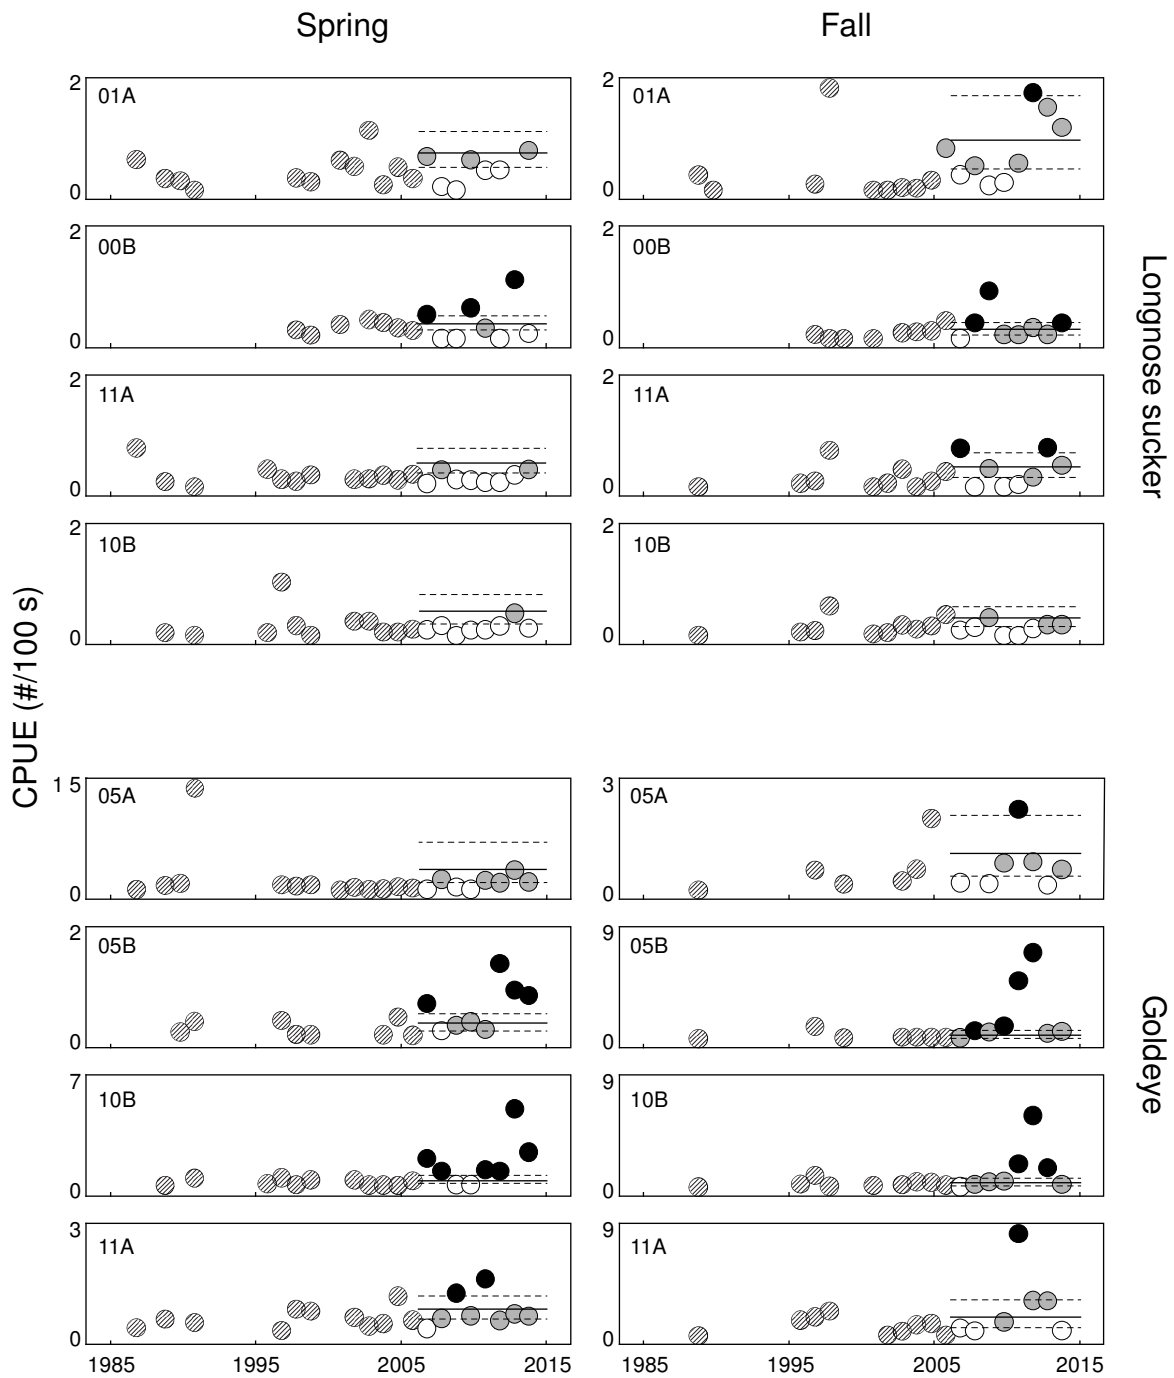

Fig. S4 Relative abundance (catch per unit effort; fish per 100 seconds of electrofishing) of longnose sucker and goldeye captured at representative locations in the Athabasca River inventories since 1987; circles with diagonal line shading are measurements done before 2007; open circle suggest no difference relative to before 2007; grey circle suggest a possible change relative to before 2007; black circles suggest a likely change relative to before 2007.

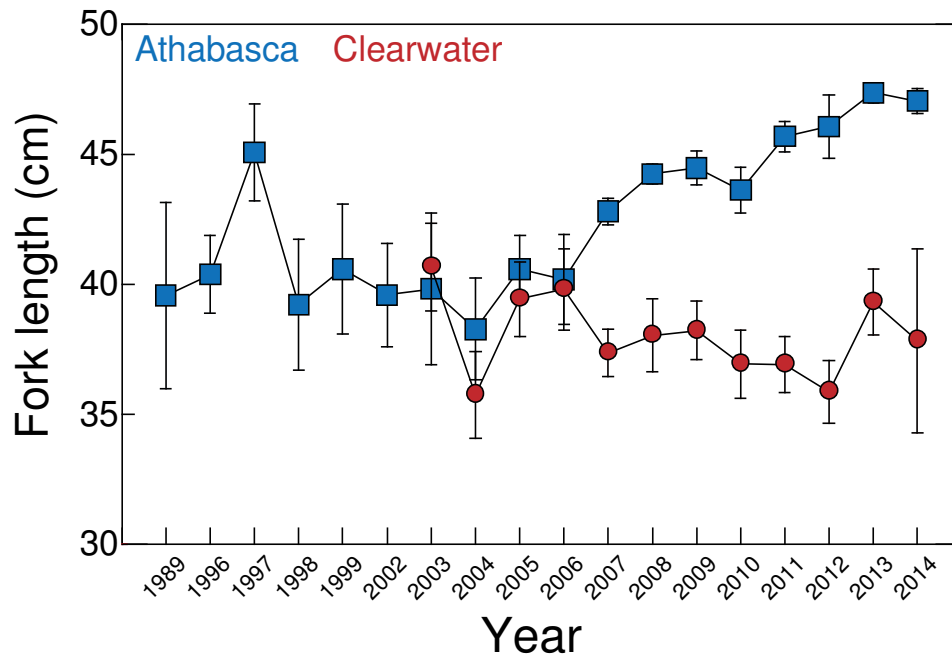

Fig. S5 Mean length ( $\pm 2SE$ ) of white sucker captured in the Athabasca and Clearwater Rivers during the respective inventories; variability in Athabasca in 2008 and 2013 obscured by symbol size.



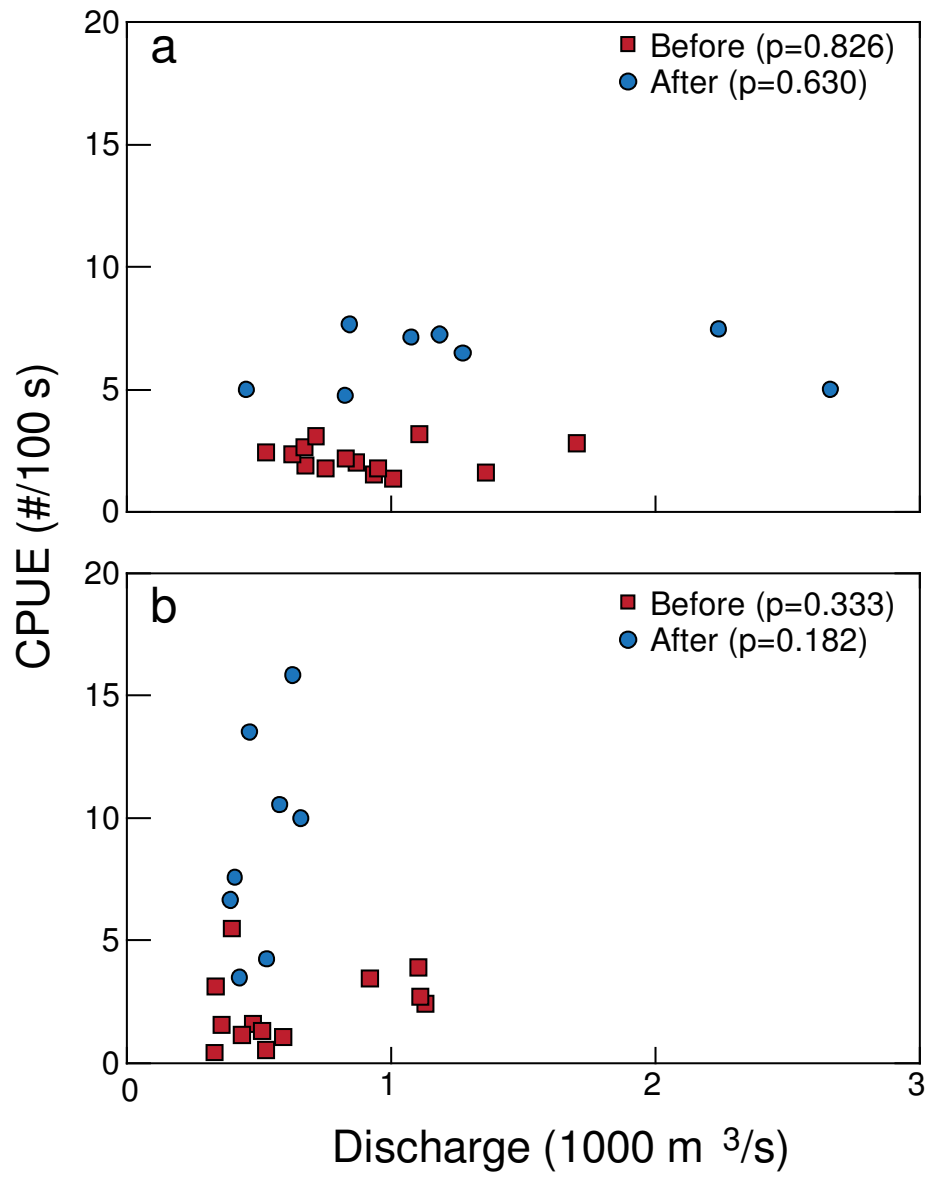

Fig. S6 Catch-per-unit-effort (CPUE; fish per 100s) vs discharge (1000 m<sup>3</sup>/s) during the Spring (a) and Fall (b) inventories in the Athabasca River for years before 2007 (■) and years after 2006 (●).

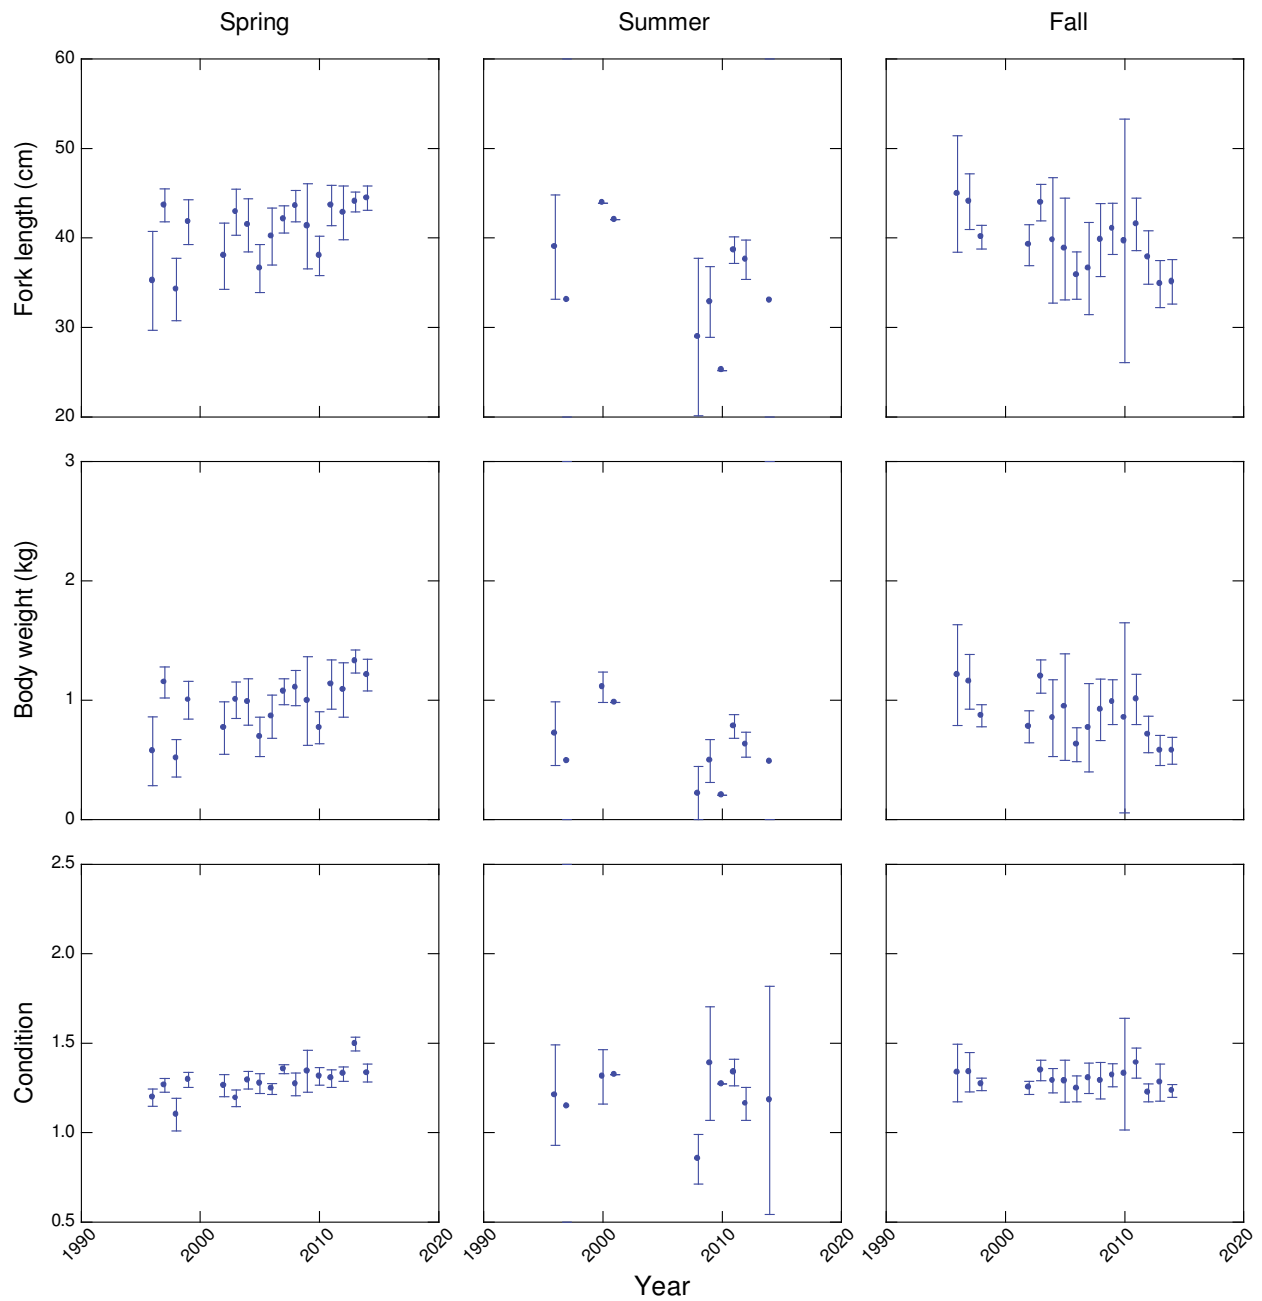

Fig. S9 Mean fork length ( $\pm 2SE$ ), body weight ( $\pm 2SE$ ), and condition ( $\pm 2SE$ ) of longnose sucker captured in the spring, summer, and fall inventories conducted in the mainstem Athabasca since 1987.

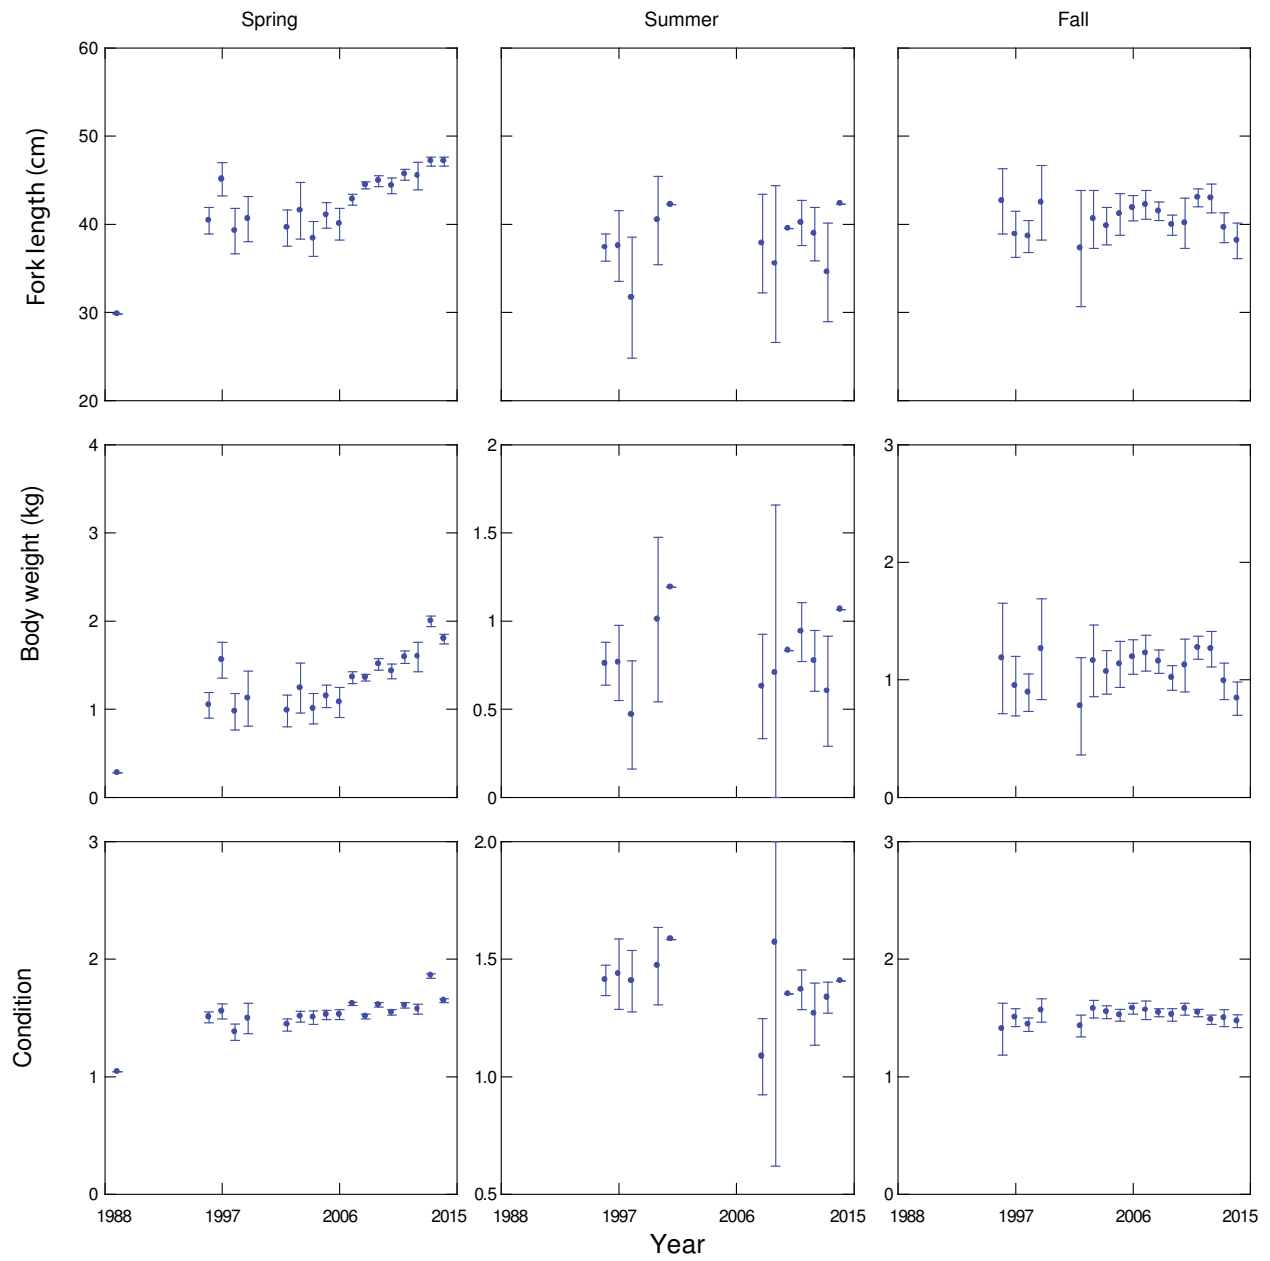

Fig. S10 Mean fork length ( $\pm 2SE$ ), body weight ( $\pm 2SE$ ), and condition ( $\pm 2SE$ ) of white sucker captured in the spring, summer, and fall inventories conducted in the mainstem Athabasca since 1987.

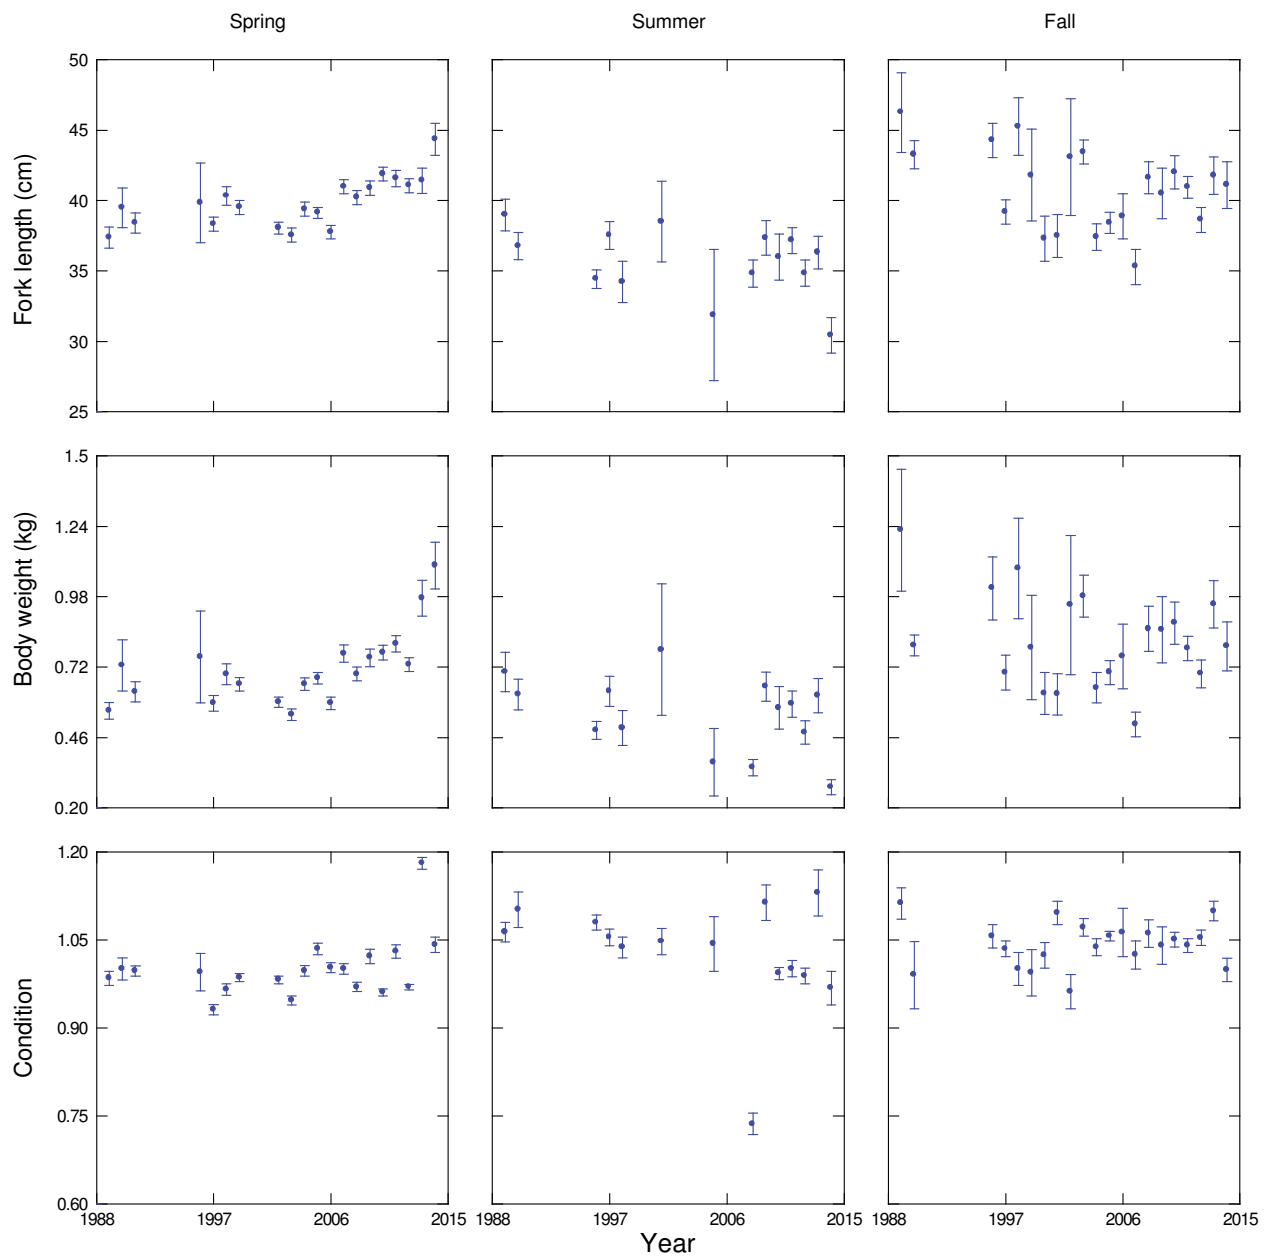

Fig. S11 Mean fork length ( $\pm 2SE$ ), body weight ( $\pm 2SE$ ), and condition ( $\pm 2SE$ ) of walleye captured in the spring, summer, and fall inventories conducted in the mainstem Athabasca since 1987.

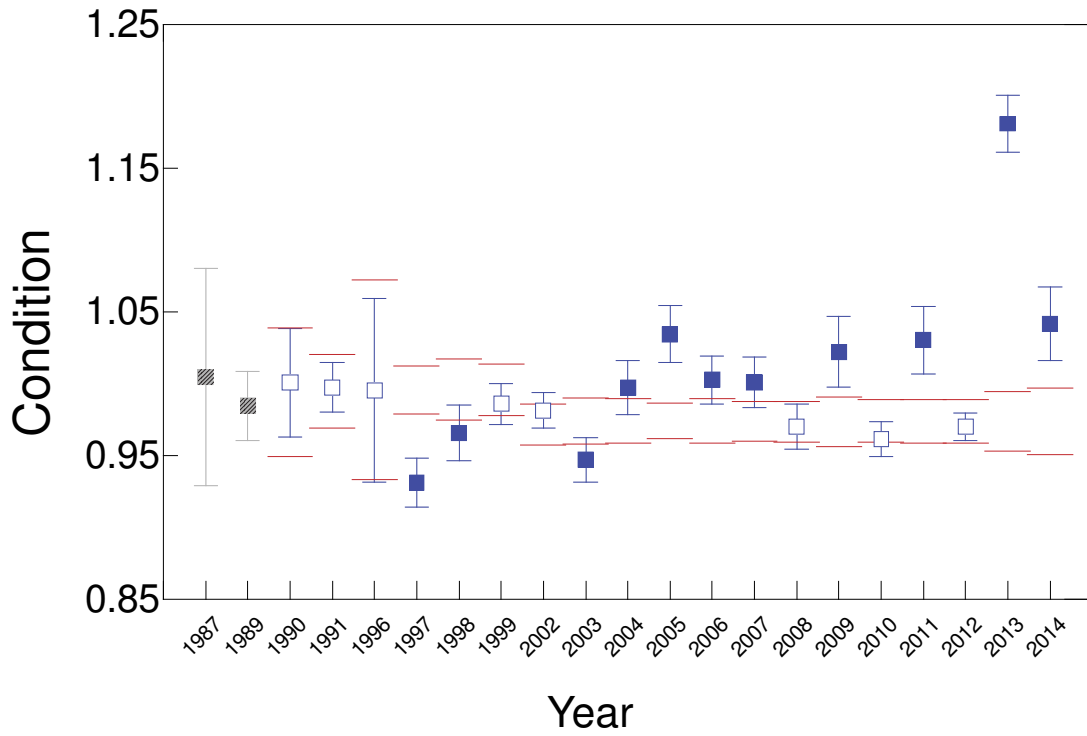

Fig. S12 Mean condition ( $\pm 2SE$ ) of walleye captured in the spring evaluated using triggers derived from nonparametric bootstrapping; resample size ( $m$ ) set to sample size ( $n$ ) of test year; number of resampled means = 10,000; hatched symbols=baseline years; open symbols=no exceedance; closed symbols=exceedance.

Table S1 Approximate upstream and downstream limits (latitude (°N) and longitude (°W)) for RAMP fish inventory reaches emphasized in this study.

| Reach | Upstream limit |           | Downstream limit |           |
|-------|----------------|-----------|------------------|-----------|
|       | Latitude       | Longitude | Latitude         | Longitude |
| 00B   | 56.892         | 111.416   | 56.916           | 111.428   |
| 01A   | 56.914         | 111.436   | 56.938           | 111.442   |
| 04A   | 56.990         | 111.446   | 57.007           | 111.472   |
| 05A   | 57.007         | 111.472   | 57.027           | 111.500   |
| 05B   | 57.027         | 111.500   | 57.049           | 111.512   |
| 10B   | 56.993         | 111.442   | 57.010           | 111.463   |
| 11A   | 57.120         | 111.592   | 57.152           | 111.618   |
| 16A   | 57.147         | 111.624   | 57.183           | 111.628   |
| 17A   | 57.292         | 111.673   | 57.321           | 111.682   |

Table S2 Sample sizes (n) for fish collected in Spring Inventory after subsection to outlier/juvenile removal; \*single fish weight and condition of fish included in estimate for 1996.

| Species      | Year | Fork length | Body weight | k   |
|--------------|------|-------------|-------------|-----|
| White sucker | 1989 | 15          | 1*          | 1*  |
|              | 1996 | 38          | 38          | 38  |
|              | 1997 | 48          | 48          | 48  |
|              | 1998 | 41          | 41          | 41  |
|              | 1999 | 24          | 24          | 24  |
|              | 2002 | 35          | 35          | 35  |
|              | 2003 | 29          | 29          | 29  |
|              | 2004 | 72          | 71          | 71  |
|              | 2005 | 76          | 76          | 76  |
|              | 2006 | 53          | 55          | 53  |
|              | 2007 | 310         | 310         | 309 |
|              | 2008 | 448         | 445         | 445 |
|              | 2009 | 202         | 200         | 200 |
|              | 2010 | 159         | 159         | 159 |
|              | 2011 | 223         | 223         | 223 |
|              | 2012 | 69          | 69          | 69  |
| 2013         | 275  | 273         | 273         |     |
| 2014         | 396  | 396         | 396         |     |
| Walleye      | 1987 | 93          | 29          | 29  |
|              | 1989 | 72          | 65          | 65  |
|              | 1990 | 36          | 36          | 36  |
|              | 1991 | 97          | 97          | 97  |
|              | 1996 | 11          | 11          | 11  |
|              | 1997 | 180         | 180         | 180 |
|              | 1998 | 108         | 107         | 107 |
|              | 1999 | 153         | 151         | 151 |
|              | 2002 | 224         | 223         | 223 |
|              | 2003 | 162         | 162         | 162 |
|              | 2004 | 177         | 175         | 175 |
|              | 2005 | 339         | 339         | 339 |
|              | 2006 | 192         | 192         | 192 |
|              | 2007 | 227         | 225         | 225 |
|              | 2008 | 231         | 230         | 230 |
|              | 2009 | 147         | 146         | 146 |
|              | 2010 | 215         | 213         | 213 |
|              | 2011 | 196         | 196         | 196 |
| 2012         | 205  | 203         | 203         |     |
| 2013         | 106  | 104         | 104         |     |
| 2014         | 81   | 81          | 81          |     |

Table S3 Catch (n) per species and effort (electrofishing seconds) recorded in the Spring Athabasca Inventories at focal (00B, 01A, 04A, 04B, 05A, 05B, 10B, 11A, 16A, 17A) locations sampled in 1987-2014.

| Year | Effort (seconds) | Species and catch (n) |      |      |      |      |      |      |      |      |      |      |      |      |      |      |      |      |      |      |      |      |      |      |      |     |      |      |      |       |
|------|------------------|-----------------------|------|------|------|------|------|------|------|------|------|------|------|------|------|------|------|------|------|------|------|------|------|------|------|-----|------|------|------|-------|
|      |                  | ARGR                  | BLTR | BRST | BURB | CISC | EMSH | FLCH | FNDC | FTMN | GOLD | LKCH | LKTR | LKWH | LNDC | LNSC | MNWH | NNST | NRDC | NRPK | PRDC | SLSC | SPSC | SPSH | TRPR | UNK | WALL | WHSC | YLPR | sum   |
| 1987 | 14,900           | 0                     | 0    | 0    | 0    | 0    | 0    | 26   | 0    | 0    | 27   | 0    | 0    | 1    | 0    | 139  | 0    | 0    | 0    | 5    | 0    | 0    | 0    | 0    | 0    | 0   | 95   | 7    | 0    | 300   |
| 1989 | 27,100           | 0                     | 0    | 0    | 2    | 0    | 2    | 51   | 0    | 0    | 102  | 0    | 0    | 3    | 0    | 19   | 1    | 0    | 0    | 28   | 0    | 0    | 0    | 0    | 1    | 0   | 122  | 31   | 0    | 362   |
| 1990 | 7,705            | 0                     | 0    | 0    | 1    | 0    | 0    | 2    | 0    | 0    | 41   | 0    | 0    | 0    | 0    | 3    | 0    | 0    | 0    | 3    | 0    | 0    | 0    | 0    | 0    | 0   | 36   | 3    | 0    | 89    |
| 1991 | 26,790           | 0                     | 0    | 0    | 7    | 0    | 0    | 5    | 0    | 0    | 157  | 0    | 0    | 3    | 0    | 6    | 0    | 0    | 0    | 21   | 0    | 0    | 0    | 0    | 2    | 0   | 171  | 6    | 0    | 378   |
| 1996 | 4,405            | 0                     | 0    | 0    | 0    | 0    | 0    | 4    | 0    | 0    | 4    | 1    | 0    | 3    | 0    | 9    | 1    | 0    | 0    | 5    | 0    | 0    | 0    | 0    | 0    | 0   | 12   | 38   | 0    | 77    |
| 1997 | 20,056           | 0                     | 0    | 0    | 3    | 0    | 1    | 72   | 0    | 0    | 110  | 11   | 0    | 2    | 0    | 68   | 10   | 0    | 0    | 11   | 0    | 0    | 0    | 2    | 26   | 0   | 185  | 54   | 2    | 557   |
| 1998 | 18,507           | 1                     | 0    | 0    | 0    | 0    | 4    | 45   | 0    | 0    | 66   | 2    | 0    | 5    | 0    | 34   | 0    | 0    | 0    | 14   | 0    | 0    | 0    | 1    | 10   | 0   | 117  | 47   | 2    | 348   |
| 1999 | 16,270           | 0                     | 0    | 0    | 3    | 0    | 1    | 26   | 0    | 0    | 74   | 1    | 0    | 4    | 0    | 31   | 2    | 0    | 0    | 26   | 0    | 0    | 1    | 0    | 6    | 0   | 155  | 27   | 0    | 357   |
| 2001 | 6,430            | 0                     | 0    | 0    | 0    | 0    | 34   | 25   | 0    | 0    | 17   | 0    | 0    | 0    | 0    | 16   | 0    | 0    | 0    | 7    | 0    | 0    | 0    | 4    | 8    | 0   | 20   | 19   | 0    | 150   |
| 2002 | 18,271           | 1                     | 0    | 0    | 0    | 0    | 2    | 65   | 0    | 0    | 63   | 0    | 0    | 0    | 0    | 26   | 3    | 0    | 0    | 21   | 0    | 1    | 1    | 0    | 14   | 0   | 237  | 45   | 0    | 479   |
| 2003 | 22,529           | 0                     | 0    | 0    | 0    | 1    | 3    | 41   | 0    | 0    | 49   | 3    | 0    | 1    | 0    | 53   | 4    | 0    | 0    | 20   | 0    | 0    | 1    | 0    | 13   | 0   | 168  | 32   | 0    | 389   |
| 2004 | 25,783           | 1                     | 0    | 1    | 0    | 0    | 18   | 75   | 0    | 2    | 51   | 12   | 0    | 13   | 0    | 33   | 1    | 0    | 0    | 20   | 0    | 0    | 1    | 15   | 120  | 0   | 181  | 81   | 2    | 627   |
| 2005 | 24,324           | 0                     | 1    | 0    | 6    | 0    | 2    | 60   | 0    | 0    | 98   | 31   | 0    | 2    | 0    | 31   | 2    | 0    | 0    | 13   | 0    | 0    | 0    | 1    | 83   | 0   | 347  | 89   | 0    | 766   |
| 2006 | 22,869           | 0                     | 0    | 0    | 0    | 0    | 13   | 150  | 0    | 4    | 49   | 13   | 0    | 9    | 0    | 32   | 0    | 0    | 0    | 10   | 0    | 0    | 1    | 1    | 168  | 0   | 196  | 61   | 0    | 707   |
| 2007 | 24,629           | 0                     | 0    | 1    | 8    | 0    | 5    | 65   | 0    | 0    | 134  | 4    | 0    | 5    | 1    | 69   | 0    | 0    | 0    | 23   | 0    | 0    | 1    | 4    | 190  | 0   | 232  | 328  | 0    | 1,070 |
| 2008 | 18,924           | 0                     | 0    | 1    | 5    | 0    | 39   | 35   | 5    | 1    | 99   | 4    | 0    | 11   | 0    | 37   | 3    | 0    | 0    | 15   | 0    | 0    | 1    | 0    | 294  | 1   | 236  | 467  | 1    | 1,255 |
| 2009 | 18,233           | 0                     | 0    | 0    | 1    | 0    | 6    | 43   | 0    | 0    | 91   | 13   | 0    | 10   | 0    | 12   | 0    | 0    | 1    | 14   | 0    | 3    | 0    | 0    | 249  | 0   | 150  | 205  | 0    | 798   |
| 2010 | 21,041           | 0                     | 0    | 0    | 5    | 0    | 65   | 44   | 1    | 0    | 59   | 9    | 0    | 15   | 0    | 57   | 1    | 0    | 0    | 15   | 1    | 0    | 0    | 13   | 403  | 1   | 217  | 167  | 1    | 1,074 |
| 2011 | 18,612           | 0                     | 0    | 0    | 2    | 0    | 7    | 43   | 1    | 0    | 212  | 0    | 0    | 4    | 0    | 23   | 13   | 0    | 0    | 19   | 2    | 3    | 0    | 0    | 390  | 0   | 208  | 227  | 0    | 1,154 |
| 2012 | 15,265           | 0                     | 0    | 0    | 3    | 0    | 8    | 155  | 0    | 0    | 125  | 12   | 0    | 1    | 0    | 22   | 0    | 0    | 0    | 17   | 0    | 0    | 0    | 7    | 354  | 0   | 207  | 80   | 0    | 991   |
| 2013 | 15,371           | 1                     | 0    | 0    | 10   | 0    | 4    | 101  | 4    | 0    | 320  | 4    | 0    | 1    | 0    | 112  | 0    | 0    | 0    | 28   | 0    | 0    | 0    | 3    | 46   | 0   | 134  | 342  | 4    | 1,114 |
| 2014 | 13,798           | 0                     | 0    | 0    | 8    | 0    | 3    | 67   | 0    | 0    | 190  | 5    | 0    | 6    | 0    | 38   | 0    | 0    | 0    | 16   | 2    | 0    | 0    | 7    | 249  | 0   | 81   | 402  | 0    | 1,074 |

**ARGR:** Arctic grayling (*Thymallus arcticus*); **ARLM:** Arctic lamprey (*Lampetra japonica*); **BKTR:** brook trout (*Salvelinus fontinalis*); **BRMN:** brassy minnow (*Hybognathus hankinsoni*); **BRST:** brook stickleback (*Culaea inconstans*); **BLTR:** bull trout (*Salvelinus confluentus*); **BURB:** burbot (*Lota lota*); **CISC:** cisco (*Coregonus artedii*) **EMSH:** emerald shiner (*Notropis atherinoides*); **FLCH:** flathead chub (*Platygobio gracilis*); **FNDC:** finescale dace (*Phoxinus neogaeus*); **FTMN:** fathead minnow (*Pimephales promelas*); **GOLD:** goldeye (*Hiodon alosoides*); **LKCH:** lake chub (*Couesius plumbeus*); **LKTR:** lake trout (*Salvelinus namaycush*); **LKWH:** lake whitefish (*Coregonus clupeaformis*); **LNDC:** longnose dace (*Rhinichthys cataractae*); **LNSC:** longnose sucker (*Catostomus catostomus*); **MNWH:** mountain whitefish (*Prosopium williamsoni*); **NRPK:** northern pike (*Esox lucius*); **NNST:** ninespike stickleback (*Pungitius pungitius*); **NRDC:** northern redbelly dace (*Phoxinus eos*); **PRDC:** pearl dace (*Semotilus margarita*); **SLSC:** slimy sculpin (*Cottus cognatus*); **SPSC:** spoonhead sculpin (*Cottus ricei*); **SPSH:** spottail shiner (*Notropis hudonius*); **RVSH:** river shiner (*Notropis blennioides*); **RNTR:** rainbow trout (*Oncorhynchus mykiss*); **TRPR:** trout-perch (*Percopsis omiscomaycus*); **WALL:** walleye (*Sander vitreus*); **WHSC:** white sucker (*Catostomus commersoni*); **YLPR:** yellow perch (*Perca flavescens*) ; **UNK:** Unknown.



Table S4 Catch per species (n) and effort (electrofishing seconds) recorded in the Spring Athabasca Inventories at focal (00B, 01A, 04A, 04B, 05A, 05B, 10B, 11A, 16A, 17A) locations sampled in 1987-2014.

| Year | Effort (seconds) | Species and catch (n) |      |      |      |      |      |      |      |      |      |      |      |      |      |      |      |      |      |      |      |      |      |      |      | sum |     |      |      |       |
|------|------------------|-----------------------|------|------|------|------|------|------|------|------|------|------|------|------|------|------|------|------|------|------|------|------|------|------|------|-----|-----|------|------|-------|
|      |                  | ARGR                  | BLTR | BRST | BURB | CISC | EMSH | FLCH | FNDC | FTMN | GOLD | LKCH | LKTR | LKWH | LNDC | LNSC | MNWH | NNST | NRDC | NRPK | PRDC | SLSC | SPSC | SPSH | TRPR |     | UNK | WALL | WHSC | YLPR  |
| 1989 | 12,198           | 35                    | 0    | 0    | 0    | 0    | 0    | 0    | 0    | 0    | 4    | 0    | 0    | 37   | 0    | 3    | 0    | 0    | 0    | 40   | 0    | 0    | 0    | 0    | 0    | 10  | 1   | 0    | 130  |       |
| 1990 | 1,189            | 1                     | 0    | 0    | 0    | 0    | 0    | 0    | 0    | 0    | 1    | 0    | 0    | 13   | 0    | 0    | 0    | 0    | 0    | 1    | 0    | 0    | 0    | 0    | 0    | 0   | 3   | 0    | 19   |       |
| 1996 | 4,864            | 0                     | 0    | 1    | 0    | 0    | 0    | 3    | 0    | 0    | 44   | 0    | 0    | 21   | 0    | 3    | 0    | 0    | 0    | 4    | 0    | 0    | 0    | 0    | 1    | 0   | 32  | 9    | 0    | 118   |
| 1997 | 13,416           | 4                     | 0    | 0    | 0    | 0    | 0    | 32   | 0    | 0    | 134  | 2    | 0    | 47   | 0    | 10   | 2    | 0    | 0    | 15   | 0    | 0    | 0    | 0    | 14   | 0   | 86  | 19   | 0    | 365   |
| 1998 | 10,381           | 12                    | 0    | 0    | 0    | 0    | 6    | 8    | 0    | 0    | 41   | 0    | 0    | 116  | 0    | 60   | 3    | 0    | 0    | 10   | 0    | 0    | 0    | 0    | 2    | 0   | 28  | 36   | 0    | 322   |
| 1999 | 4,786            | 0                     | 0    | 0    | 0    | 0    | 3    | 3    | 0    | 0    | 9    | 0    | 0    | 35   | 0    | 1    | 0    | 0    | 0    | 9    | 0    | 0    | 0    | 0    | 0    | 0   | 5   | 8    | 0    | 73    |
| 2000 | 10,270           | 0                     | 0    | 0    | 0    | 0    | 0    | 0    | 0    | 0    | 0    | 0    | 0    | 0    | 0    | 0    | 0    | 0    | 0    | 4    | 0    | 0    | 0    | 0    | 0    | 0   | 13  | 0    | 0    | 17    |
| 2001 | 14,144           | 0                     | 0    | 0    | 0    | 0    | 4    | 4    | 0    | 0    | 5    | 0    | 0    | 2    | 0    | 1    | 0    | 0    | 0    | 3    | 0    | 0    | 0    | 0    | 3    | 0   | 19  | 1    | 0    | 42    |
| 2002 | 13,002           | 0                     | 0    | 0    | 2    | 0    | 21   | 1    | 0    | 0    | 2    | 4    | 0    | 25   | 1    | 28   | 0    | 0    | 0    | 6    | 0    | 1    | 2    | 2    | 33   | 0   | 29  | 11   | 4    | 172   |
| 2003 | 29,527           | 3                     | 0    | 0    | 1    | 2    | 3    | 11   | 0    | 0    | 41   | 2    | 0    | 43   | 0    | 36   | 12   | 0    | 0    | 30   | 2    | 0    | 0    | 0    | 40   | 0   | 84  | 24   | 4    | 338   |
| 2004 | 25,344           | 0                     | 0    | 0    | 0    | 0    | 11   | 168  | 0    | 4    | 210  | 14   | 0    | 56   | 0    | 13   | 3    | 0    | 0    | 32   | 0    | 0    | 0    | 2    | 313  | 0   | 117 | 41   | 8    | 992   |
| 2005 | 22,248           | 0                     | 0    | 0    | 0    | 34   | 7    | 128  | 0    | 0    | 172  | 20   | 0    | 105  | 0    | 27   | 5    | 0    | 0    | 27   | 0    | 1    | 2    | 0    | 84   | 0   | 137 | 31   | 3    | 783   |
| 2006 | 21,260           | 2                     | 0    | 0    | 2    | 0    | 33   | 32   | 0    | 0    | 25   | 59   | 0    | 69   | 0    | 67   | 9    | 0    | 0    | 39   | 0    | 0    | 2    | 11   | 574  | 0   | 145 | 48   | 31   | 1,148 |
| 2007 | 21,047           | 0                     | 0    | 0    | 2    | 1    | 4    | 48   | 0    | 4    | 29   | 33   | 0    | 259  | 1    | 38   | 0    | 1    | 0    | 18   | 3    | 0    | 0    | 3    | 265  | 0   | 85  | 49   | 17   | 860   |
| 2008 | 17,944           | 0                     | 0    | 0    | 1    | 0    | 7    | 40   | 0    | 0    | 214  | 13   | 0    | 395  | 0    | 24   | 2    | 0    | 0    | 14   | 0    | 0    | 0    | 0    | 425  | 0   | 92  | 83   | 1    | 1,311 |
| 2009 | 13,607           | 0                     | 0    | 0    | 2    | 0    | 13   | 33   | 0    | 0    | 86   | 8    | 0    | 342  | 0    | 42   | 1    | 0    | 0    | 10   | 0    | 0    | 0    | 7    | 193  | 0   | 83  | 60   | 0    | 880   |
| 2010 | 19,090           | 17                    | 0    | 0    | 1    | 0    | 13   | 36   | 0    | 0    | 143  | 8    | 0    | 282  | 0    | 4    | 8    | 0    | 0    | 29   | 2    | 0    | 2    | 1    | 1293 | 0   | 90  | 33   | 28   | 1,990 |
| 2011 | 16,654           | 4                     | 0    | 0    | 1    | 0    | 40   | 138  | 0    | 0    | 745  | 5    | 0    | 290  | 0    | 33   | 5    | 0    | 0    | 20   | 6    | 1    | 4    | 2    | 371  | 0   | 117 | 76   | 9    | 1,867 |
| 2012 | 14,873           | 0                     | 0    | 0    | 0    | 1    | 216  | 270  | 0    | 0    | 843  | 5    | 0    | 278  | 0    | 46   | 2    | 0    | 2    | 19   | 0    | 0    | 0    | 15   | 307  | 0   | 173 | 52   | 5    | 2,234 |
| 2013 | 16,853           | 0                     | 0    | 0    | 1    | 0    | 605  | 73   | 0    | 0    | 296  | 14   | 0    | 188  | 0    | 72   | 1    | 0    | 0    | 19   | 0    | 3    | 0    | 184  | 63   | 0   | 81  | 30   | 12   | 1,642 |
| 2014 | 16,167           | 0                     | 0    | 0    | 4    | 0    | 18   | 167  | 0    | 0    | 38   | 5    | 0    | 16   | 0    | 50   | 0    | 0    | 0    | 4    | 0    | 0    | 0    | 6    | 140  | 0   | 114 | 13   | 16   | 591   |

**ARGR:** Arctic grayling (*Thymallus arcticus*); **ARLM:** Arctic lamprey (*Lampetra japonica*); **BKTR:** brook trout (*Salvelinus fontinalis*); **BRMN:** brassy minnow (*Hybognathus hankinsoni*); **BRST:** brook stickleback (*Culaea inconstans*); **BLTR:** bull trout (*Salvelinus confluentus*); **BURB:** burbot (*Lota lota*); **CISC:** cisco (*Coregonus artedii*); **EMSH:** emerald shiner (*Notropis atherinoides*); **FLCH:** flathead chub (*Platygobio gracilis*); **FNDC:** finescale dace (*Phoxinus neogaeus*); **FTMN:** fathead minnow (*Pimephales promelas*); **GOLD:** goldeye (*Hiodon alosoides*); **LKCH:** lake chub (*Couesius plumbeus*); **LKTR:** lake trout (*Salvelinus namaycush*); **LKWH:** lake whitefish (*Coregonus clupeaformis*); **LNDC:** longnose dace (*Rhinichthys cataractae*); **LNSC:** longnose sucker (*Catostomus catostomus*); **MNWH:** mountain whitefish (*Prosopium williamsoni*); **NRPK:** northern pike (*Esox lucius*); **NNST:** ninespik stickleback (*Pungitius pungitius*); **NRDC:** northern redbelly dace (*Phoxinus eos*); **PRDC:** pearl dace (*Semotilus margarita*); **SLSC:** slimy sculpin (*Cottus cognatus*); **SPSC:** spoonhead sculpin (*Cottus ricei*); **SPSH:** spottail shiner (*Notropis hudsonius*); **RVSH:** river shiner (*Notropis blennius*); **RNTR:** rainbow trout (*Oncorhynchus mykiss*); **TRPR:** trout-perch (*Percopsis omiscomaycus*); **WALL:** walleye (*Sander vitreus*); **WHSC:** white sucker (*Catostomus commersoni*); **YLPR:** yellow perch (*Perca flavescens*); **UNK:** Unknown.
